# Supplementary material for: An efficient Cu2Zn1−xInxSn(S,Se)4 multicomponent photocathode via one-step hydrothermal approach for thin film solar cell
Source: Royal Society of Chemistry journal article supplement (doi:10.1039/d1tc04942a), 2022-01-01

## # Supporting Information

### **An Efficient $\text{Cu}_2\text{Zn}_{1-x}\text{In}_x\text{Sn}(\text{S},\text{Se})_4$ Multicomponent Photocathode via One-Step Hydrothermal Approach for Thin Film Solar Cell**

Satish S. Patil<sup>a</sup>, Sameer N. Nadaf<sup>a</sup>, Kishorkumar V. Khot<sup>a,d</sup>, Rahul M. Mane<sup>a</sup>, Suhas S. Mohite<sup>b</sup>, Sawanta S. Mali<sup>c</sup>, Chang Kook Hong<sup>c</sup>, Popatrao N. Bhosale<sup>a\*</sup>

<sup>a</sup>*Materials Research Laboratory, Department of Chemistry, Shivaji University, Kolhapur, Maharashtra, 416 004, India*

<sup>b</sup>*Bharati Vidyapeeth Yashwantrao Mohite College, Pune, Maharashtra, 411 038, India*

<sup>c</sup>*School of Applied Chemical Engineering, Chonnam National University, Gwangju, 61181, South Korea.*

<sup>d</sup>*Department of Agrochemicals & Pest Management, Shivaji University, Kolhapur, MS-India, 004.*

Email: [satishpatil1392@gmail.com](mailto:satishpatil1392@gmail.com),

[p\\_n\\_bhosale@rediffmail.com](mailto:p_n_bhosale@rediffmail.com)

## Table of Contents

**Table S1:** Preparative parameters for hydrothermal synthesis of the  $\text{Cu}_2\text{Zn}_{1-x}\text{In}_x\text{Sn}(\text{S},\text{Se})_4$  thin films.

**Table S2:** Compositional data for  $\text{Cu}_2\text{Zn}_{1-x}\text{In}_x\text{Sn}(\text{S},\text{Se})_4$  thin films

**Figure S1:** Plot of thickness associated with band gap energy of  $\text{Cu}_2\text{Zn}_{1-x}\text{In}_x\text{Sn}(\text{S},\text{Se})_4$  films as a function of  $\text{In}^{3+}$  ion concentration.

**Figure S2:** The cross-section SEM images of deposited CZTSSe and  $\text{In}^{3+}$  doped CZITSSe ( $\text{I}_1\text{-I}_4$ ) thin films

**Figure S3:** Correlation between  $J_{sc}$  corresponding to  $V_{oc}$  as a function of  $\text{In}^{3+}$  ion concentration

**Table S1:** Preparative parameters for hydrothermal synthesis of the  $\text{Cu}_2\text{Zn}_{1-x}\text{In}_x\text{Sn}(\text{S},\text{Se})_4$  thin films.

| Sr. No.  | Sample Code | $\text{In}^{3+}$ ion concentration (M/mL) | Composition                                                                    | pH            | Temperature               |
|----------|-------------|-------------------------------------------|--------------------------------------------------------------------------------|---------------|---------------------------|
| <b>1</b> | $I_1$       | 0.00                                      | $\text{Cu}_2\text{ZnSn}(\text{S},\text{Se})_4$                                 | $8.2 \pm 0.2$ | $180 \pm 2^\circ\text{C}$ |
| <b>2</b> | $I_2$       | 0.025                                     | $\text{Cu}_2\text{Zn}_{0.075}\text{In}_{0.025}\text{Sn}(\text{S},\text{Se})_4$ |               |                           |
| <b>3</b> | $I_3$       | 0.05                                      | $\text{Cu}_2\text{Zn}_{0.05}\text{In}_{0.05}\text{Sn}(\text{S},\text{Se})_4$   |               |                           |
| <b>4</b> | $I_4$       | 0.075                                     | $\text{Cu}_2\text{Zn}_{0.025}\text{In}_{0.075}\text{Sn}(\text{S},\text{Se})_4$ |               |                           |

**Table S2:** Compositional data for  $\text{Cu}_2\text{Zn}_{1-x}\text{In}_x\text{Sn}(\text{S},\text{Se})_4$  thin films temperature.

| Sample Code             | Cu          | Zn          | In         | Sn          | S           | Se          | $\frac{(\text{Zn} + \text{In})}{\text{Sn}}$ | $\frac{\text{Cu}}{(\text{Zn} + \text{In} + \text{Sn})}$ | $\frac{(\text{Cu} + \text{Zn} + \text{In} + \text{Sn})}{(\text{S} + \text{Se})}$ |
|-------------------------|-------------|-------------|------------|-------------|-------------|-------------|---------------------------------------------|---------------------------------------------------------|----------------------------------------------------------------------------------|
| $I_1$                   | 25.4        | 14.4        | 0.0        | 14.2        | 23.5        | 22.5        | 1.11                                        | 0.84                                                    | 1.24                                                                             |
| $I_2$                   | 25.7        | 11.6        | 4.2        | 14.4        | 22.1        | 22          | 1.09                                        | 0.85                                                    | 1.26                                                                             |
| $I_3$                   | 25.9        | 10.4        | 5.6        | 13.8        | 21.5        | 22.8        | 1.15                                        | 0.86                                                    | 1.25                                                                             |
| <b><math>I_4</math></b> | <b>26.2</b> | <b>10.1</b> | <b>6.2</b> | <b>13.4</b> | <b>20.3</b> | <b>25.8</b> | <b>1.21</b>                                 | <b>0.88</b>                                             | <b>1.18</b>                                                                      |

**Figure S1.** Plot of thickness associated with band gap energy of  $\text{Cu}_2\text{Zn}_{1-x}\text{In}_x\text{Sn}(\text{S},\text{Se})_4$  films as a function of  $\text{In}^{3+}$  ion concentration.

The thickness of the CZITSSe films is analyzed with surface profilometer. The thickness of the CZITSSe thin films was increased from 540 to 645 nm as function of  $\text{In}^{3+}$  ion concentration. As a thickness of films increases, the band gap energy was decreased from 1.42 to 1.34 eV.

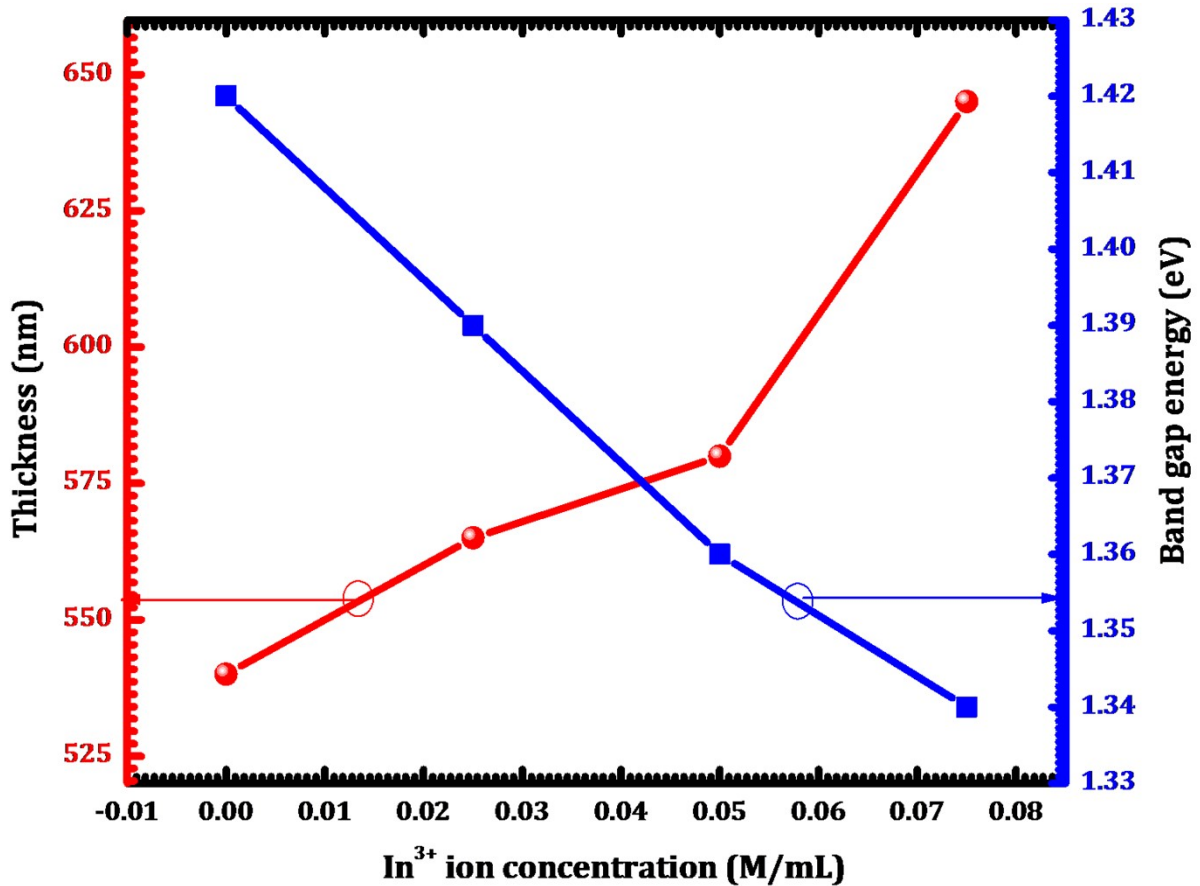

Figure S2: The cross-section SEM images of deposited CZTSSe and In<sup>3+</sup> doped CZITSSe (I<sub>1</sub>-I<sub>4</sub>) thin films

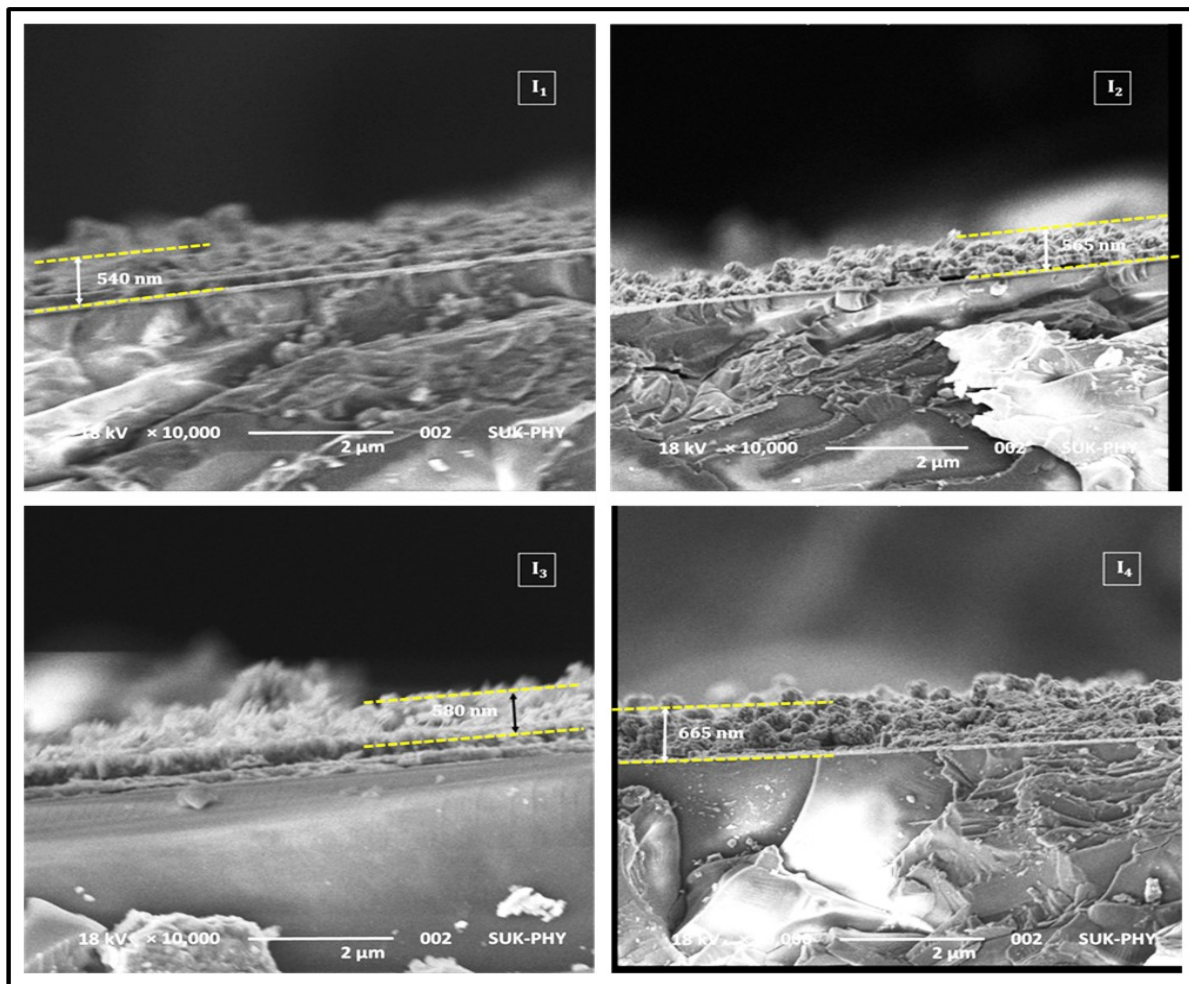

**Figure S3:** Correlation between  $J_{sc}$  corresponding to  $V_{oc}$  as a function of  $\text{In}^{3+}$  ion concentration in photoelectrochemical performance.

Figure S3 (a, b) depicts the correlated data of  $\text{Cu}_2\text{Zn}_{1-x}\text{In}_x\text{Sn}(\text{S,Se})_4$  thin films respectively. As  $\text{In}^{3+}$  ion concentration increases the short circuit current and open circuit voltage increases.

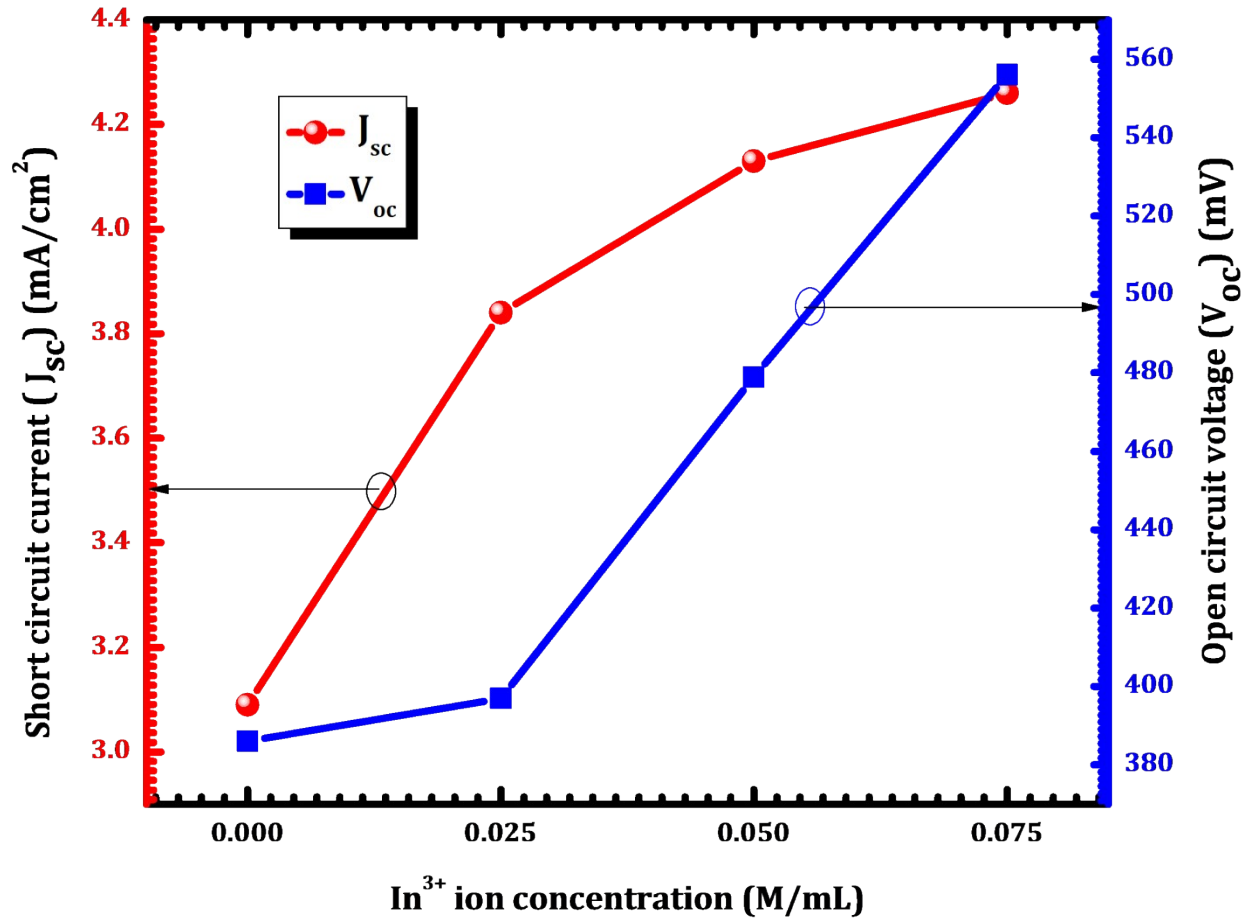

Supplement: d1tc04942a1.pdf [file d1tc04942a1.pdf]
